# Supplementary material for: Patient-centered care during the last year of life: adaptation and validation of the German PACIC short form for bereaved persons as proxies (PACIC-S9-proxy)
Source: BMC Palliat Care. 2020 Nov 24;19:177. doi: 10.1186/s12904-020-00687-x (PMC7687735; doi:10.1186/s12904-020-00687-x)
Supplement: Supplementary file 1 — Additional file 1: Supplementary file 1. English Version: Patient Assessment of Chronic Illness Care Short Form for Proxies (PACIC-S9-Proxy) [file 12904_2020_687_MOESM1_ESM.pdf]

**English Version: Patient Assessment of Chronic Illness Care Short Form for Proxies (PACIC-S9-Proxy)**

[illegible]
